# Supplementary material
Source: PubMed Central journal article supplement (PMC5702464)
Supplement: NIHMS920880-supplement-Supplemental.pdf [file NIHMS920880-supplement-Supplemental.pdf]

## 1 Supplement

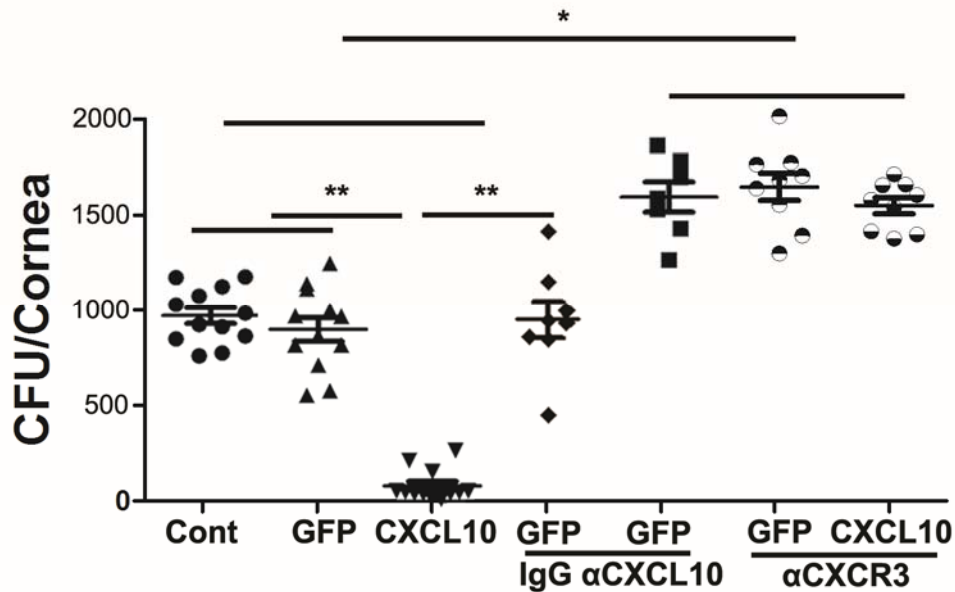

2

3 **sFigure 1. CXCL10-CXCR3-mediated signaling is required for CA clearance in the cornea.**

4 The CXCL10 or CXCR3 neutralizing antibodies, along with control rabbit IgG, were injected into  
 5 subconjunctival spaces 4 h prior to AAV-GFP or CXCL10 infection for 2 weeks, followed by CA  
 6 inoculation. At 1dpi, the eyes were enucleated and subjected to fungal culture by colony  
 7 counting. The results are presented as the number of CFU per cornea. A nonparametric Mann-  
 8 Whitney U test was performed to compare each flagellin pretreatment to the PBS group  
 9 ( $*P < 0.05$ ,  $**P < 0.01$ ,  $n = 5$ ). Results are representative of three independent experiments.

10

11

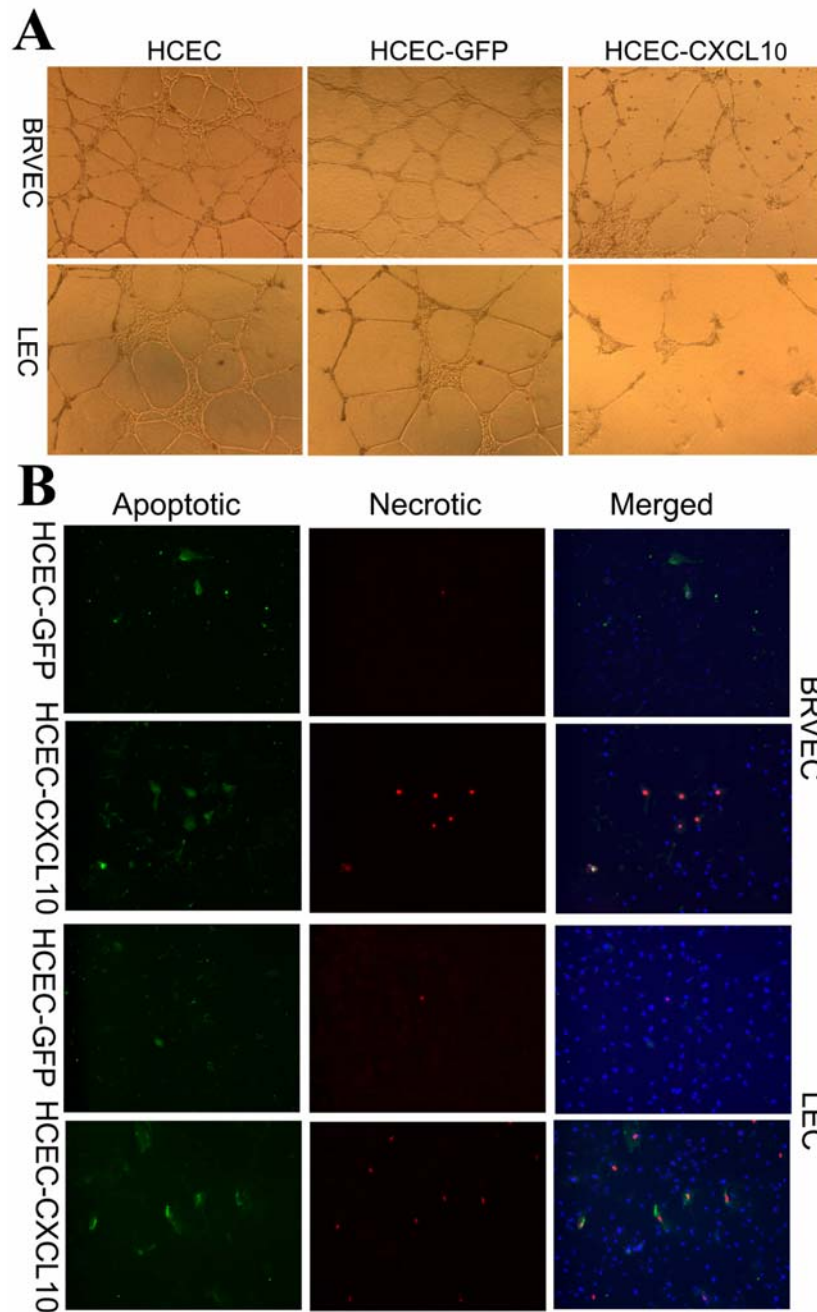

12

13 **sFigure 2. CXCL10 induce apoptosis of vessel endothelial cells *in vitro*.** Human CECs  
 14 were starved overnight and transfected with  $1.5 \times 10^{11}$  cfu of AAV2-GFP or -CXCL10. At day 3  
 15 post infection, fresh medium were replaced and cells were further cultured for 1 day and media  
 16 collected as conditioned media for the culture of hBRVECs or primary lymphatic endothelial  
 17 cells (LECs) which were photographed by ZEISS Axiovert 200 microscope(**A**) or subjected to  
 18 Annexin V and propidium iodide staining for apoptotic and necrotic cells (**B**).

19

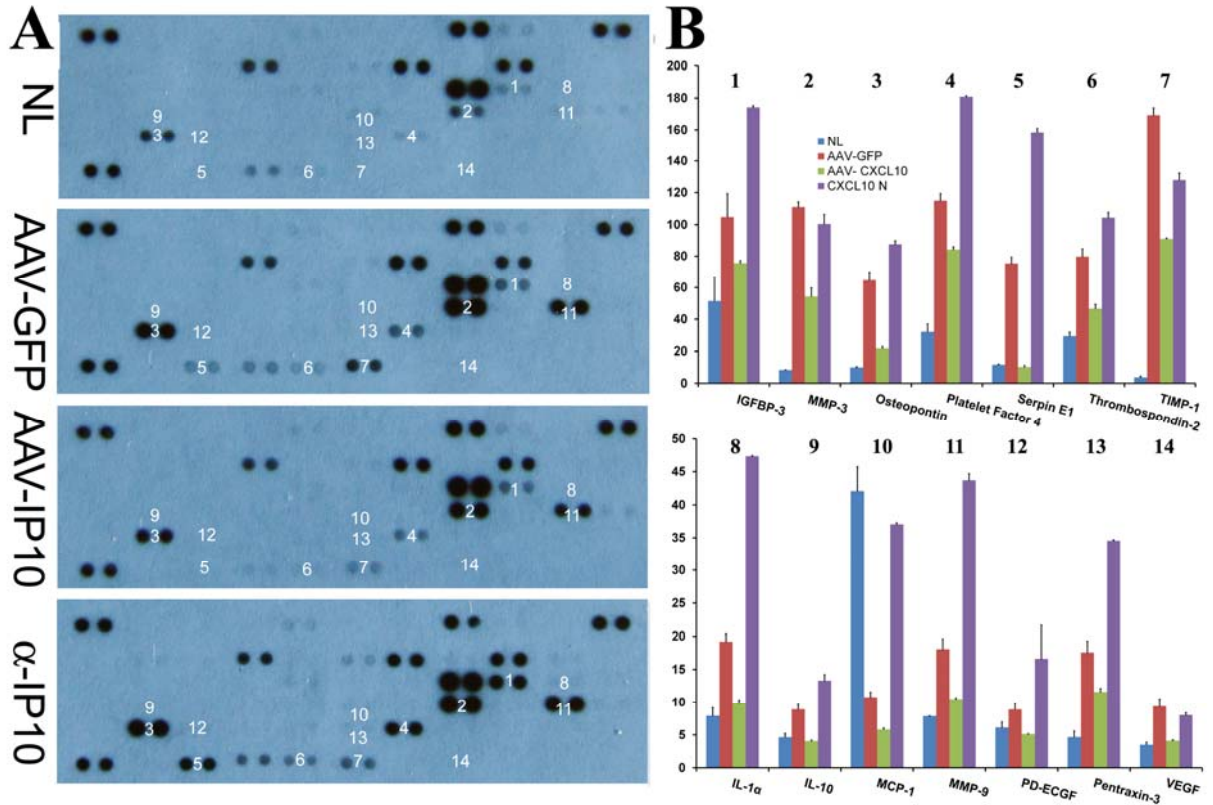

20

21 **sFigure 3. Proteome array analysis of angiogenic growth factors. A.** Proteome Profiler  
 22 arrays probed with extracts of AAV9-CXCL10 or AAV9-GFP transfected or anti-CXCL10 treated  
 23 corneas 4 days post *C. albicans* infection; numbers indicate individual factors with detectable  
 24 differences among 4 conditions. **B.** Average protein expression levels of two spots on an array  
 25 were measured by using by Photoshop.

26

27

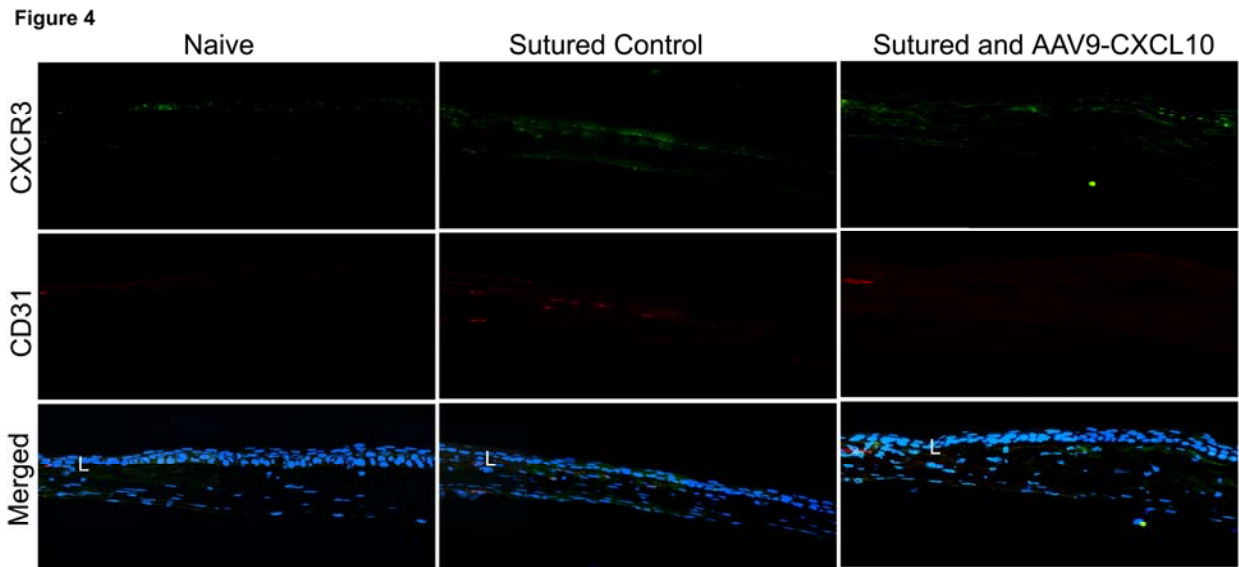

28

29 **sFigure 4. The colocalization of CD11c and CXCR3.** C57BL/6 mouse corneas (n = 3 for each  
30 condition) were infected with injected AAV-GFP or CXCL10 for 2 weeks, followed by sutured as  
31 described in Figure 3, then stained with CXCR3 and CD31.

32
